# Supplementary material for: Prognosis of Chronically Ventilated Patients in a Long-Term Ventilation Facility: Association with Age, Consciousness and Cognitive State
Source: PubMed Central journal article supplement — J Intensive Care Med. 2022 Mar 29;37(12):1587–97. doi: 10.1177/08850666221088800 (PMC9647314; doi:10.1177/08850666221088800), 2022-03-29
Supplement: sj-pdf-1-jic-10.1177_08850666221088800.pdf [file sj-pdf-1-jic-10.1177_08850666221088800.pdf]

## SUPPLEMENTAL MATERIAL

### **Prognosis of Chronically Ventilated Patients in a Long-Term Ventilation Facility: Association with Age, Consciousness and Cognitive State**

*Stein D, Sviri S, Beil M, Stav I, Marcus EL*

**J Intensive Care Med. doi: 10.1177/08850666221088800.**

#### **Additional study variables**

We retrieved a ‘residence before acute hospital stay’ variable under three subtypes: Community/Home, Nursing Home/Closed Psychiatric Ward and Geriatric Hospital/long-term Ward in the acute care hospital. Place of intubation was recorded through the following five categories: Community-based institutions, Home, Emergency room (ER), Intensive care unit (ICU)/Operating Room (OR) and Ward.

Up to five chronic conditions were collected for each participant as this was the maximum number of chronic conditions in our cohort. We defined 17 chronic conditions i.e., Diabetes Mellitus (DM), Ischemic Heart Disease (IHD), Congestive Heart Failure (CHF), Stroke/CNS Tumors, Dementia, Chronic Kidney Disease (CKD), Neuromuscular disease (Parkinson, Multiple Sclerosis, Amyotrophic Lateral Sclerosis, Cerebral Palsy and Chronic Inflammatory Demyelinating Polyneuropathy), Chronic Obstructive Pulmonary Disease (COPD), Chronic Restrictive Lung disease, Active Hemato-Oncology disease, Chronic Liver disease, Auto-immune/Rheumatic disease, Intellectual Disability, Traumatic Brain Injury (TBI), Psychiatric disease, Alcohol/Drug abuse and Others.

We defined two variables: ‘acute condition leading to acute care hospital (ACH) admission’ and ‘main reason for ventilation’. The former was categorized with the following, Pneumonia /Respiratory infection (aspiration), Other pulmonary, Sepsis /Severe infection, Exacerbation or end-stage chronic lung disease (Chronic obstructive pulmonary disease (COPD), restrictive lung disease), Acute coronary syndrome (ACS)/Congestive Heart Failure (Pulmonary emboli included), Post-Cardio-pulmonary resuscitation (CPR)/anoxia, Acute/Progressive neuromuscular, Acute neurological event (i.e., ischemic stroke, epileptic seizure, intra-cerebral hemorrhage), Head Trauma/other trauma, Postoperative: orthopedic, Postoperative: cardiothoracic, Postoperative: abdominal and others, Gastro-intestinal hemorrhage, Encephalopathy and Others, and the latter were grouped into the following categories:

Pneumonia/ Other Acute Pulmonary Condition; Exacerbation or End-Stage Chronic Lung Disease; Sepsis or septic shock; Cardiac decompensation: Acute coronary syndrome/ Congestive Heart Failure; Post-Cardio-Pulmonary Resuscitation (CPR)/Anoxic Brain Damage; Acute Neurological Event; Acute/Progressive Neuromuscular Condition; Postoperative and Other.

In subjects admitted in vegetative state/ minimally conscious state we aggregated all categories as presenting some form of anoxic brain damage apart from Acute/Progressive neuromuscular, Acute neurological event and traumatic brain injury (TBI).

Also, ICU admission at ACH was recorded in a binary fashion (Yes/No) and when at LTACH, the number of transfers to ER and the number of admissions to ACH were recorded.

**Supplemental Table 1.** Main Reasons Leading to Chronic Mechanical Ventilation According to Age Groups.

|                                                         | Total     | 40-59     | 60-79     | ≥ 80      | <i>P</i> * |
|---------------------------------------------------------|-----------|-----------|-----------|-----------|------------|
|                                                         | (n=308)   | (n=36)    | (n=146)   | (n=126)   |            |
| Main Reason for Ventilation, n (%)                      |           |           |           |           | .486       |
| Pneumonia/ Other Acute Pulmonary Condition              | 92 (29.9) | 9 (25.0)  | 36 (24.7) | 47 (37.3) |            |
| Sepsis or septic shock                                  | 26 (8.4)  | 4 (11.1)  | 15 (10.3) | 7 (5.6)   |            |
| Exacerbation or End-Stage Chronic Lung Disease          | 31 (10.1) | 3 (8.3)   | 15 (10.3) | 7 (5.6)   |            |
| Acute Coronary Syndrome/ Congestive Heart Failure       | 7 (2.3)   | 0 (0)     | 4 (2.7)   | 3 (2.4)   |            |
| Post-Cardiopulmonary Resuscitation/ Anoxic Brain Damage | 82 (26.6) | 12 (33.3) | 41 (28.1) | 29 (23.0) |            |
| Acute/ Progressive Neuromuscular Condition              | 11 (3.6)  | 2 (5.6)   | 8 (5.5)   | 1 (0.8)   |            |
| Acute Neurological Event                                | 28 (9.1)  | 4 (11.1)  | 11 (7.5)  | 13 (10.3) |            |
| Postoperative                                           | 21 (6.8)  | 1 (2.8)   | 12 (8.2)  | 8 (6.3)   |            |
| Other                                                   | 10 (3.2)  | 1 (2.8)   | 4 (2.7)   | 5 (4.0)   |            |

\**P* value refers to the difference between age groups.

**Supplemental Table 2.** Consciousness and Cognitive State at Three Time Points According to Age Groups.

|                                                                  | Total      | 40-59     | 60-79     | ≥ 80      | <i>P</i> * |
|------------------------------------------------------------------|------------|-----------|-----------|-----------|------------|
|                                                                  | (n=308)    | (n=36)    | (n=146)   | (n=126)   |            |
| Consciousness and Cognitive State Prior to the Event, n (%)      |            |           |           |           | <.001      |
| VS/MCS                                                           | 4 (1.3)    | 0 (0)     | 4 (2.7)   | 0 (0)     |            |
| SCI                                                              | 71 (23.1)  | 4 (11.1)  | 19 (13.0) | 48 (38.1) |            |
| Mild/Moderate Cognitive Impairment                               | 57 (18.5)  | 4 (11.1)  | 19 (13.0) | 34 (27.0) |            |
| No Cognitive Impairment                                          | 162 (52.6) | 22 (61.1) | 96 (65.8) | 44 (34.9) |            |
| Intellectual Disability/Psychiatric Disorder                     | 14 (4.5)   | 6 (16.7)  | 8 (5.5)   | 0 (0)     |            |
| Consciousness and Cognitive State at Admission to LTACH, n (%)   |            |           |           |           | <.001      |
| VS/MCS                                                           | 130 (42.2) | 19 (52.8) | 68 (46.6) | 43 (34.1) |            |
| SCI                                                              | 100 (32.5) | 4 (11.1)  | 27 (18.5) | 69 (54.8) |            |
| Mild/Moderate Cognitive Impairment                               | 34 (11.0)  | 2 (5.6)   | 19 (13.0) | 13 (10.3) |            |
| No Cognitive Impairment                                          | 38 (12.3)  | 8 (22.2)  | 29 (19.9) | 1 (0.8)   |            |
| Intellectual Disability/Psychiatric Disorder                     | 6 (1.9)    | 3 (8.3)   | 3 (2.1)   | 0 (0)     |            |
| Consciousness and Cognitive State at the End of Follow-Up, n (%) |            |           |           |           | <.001      |
| VS/MCS                                                           | 126 (40.9) | 18 (50.0) | 69 (47.3) | 39 (31.0) |            |
| SCI                                                              | 110 (35.7) | 5 (13.9)  | 32 (21.9) | 73 (57.9) |            |
| Mild/Moderate Cognitive Impairment                               | 32 (10.4)  | 2 (5.6)   | 18 (12.3) | 12 (9.5)  |            |
| No Cognitive Impairment                                          | 35 (11.4)  | 8 (22.2)  | 25 (17.1) | 2 (1.6)   |            |

|                                              |         |         |         |       |
|----------------------------------------------|---------|---------|---------|-------|
| Intellectual Disability/Psychiatric Disorder | 5 (1.6) | 3 (8.3) | 2 (1.4) | 0 (0) |
|----------------------------------------------|---------|---------|---------|-------|

---

LTACH = long-term acute care hospital; SCI = severe cognitive impairment; VS/MCS = vegetative state/minimally conscious state.

\* *P* values refer to differences between age groups.

**Supplemental Table 3.** Ventilation and Weaning Outcomes at Two Time Points According to Age Groups.

|                                                       | Total      | 40-59     | 60-79      | ≥ 80       | <i>P</i> * |
|-------------------------------------------------------|------------|-----------|------------|------------|------------|
|                                                       | (n=308)    | (n=36)    | (n=146)    | (n=126)    |            |
| Daily Ventilation Time at Admission to LTACH, n (%)   |            |           |            |            | .21        |
| 24 hours                                              | 286 (93.5) | 33 (91.7) | 131 (91.0) | 122 (96.8) |            |
| 20-23 hours                                           | 2 (0.7)    | 0 (0.0)   | 2 (1.4)    | 0 (0.0)    |            |
| 8-19 hours                                            | 4 (1.3)    | 0 (0.0)   | 2 (1.4)    | 2 (1.6)    |            |
| Nocturnal ventilation                                 | 14 (4.6)   | 3 (8.3)   | 9 (6.3)    | 2 (1.6)    |            |
| Daily Ventilation Time at the End of Follow-Up, n (%) |            |           |            |            | .02        |
| 24 hours                                              | 255 (83.3) | 27 (75.0) | 115 (79.9) | 113 (89.7) |            |
| 20-23 hours                                           | 3 (1.0)    | 1 (2.8)   | 2 (1.4)    | 0 (0.0)    |            |
| 8-19 hours                                            | 9 (2.9)    | 0 (0.0)   | 4 (2.8)    | 5 (4.0)    |            |
| Nocturnal Ventilation                                 | 25 (8.2)   | 4 (11.1)  | 17 (11.8)  | 4 (3.2)    |            |
| Weaned                                                | 14 (4.6)   | 4 (11.1)  | 6 (4.2)    | 4 (3.2)    |            |

\* *P* values refer to differences between age groups.

**Supplemental Table 4.** Main Reasons for Ventilation According to Consciousness and Cognitive State at Admission to LTACH.

| Main Reasons for Ventilation                                   | Consciousness and Cognitive State at Admission to LTACH |            |                                    |                         |                                              | Total, n (%) |
|----------------------------------------------------------------|---------------------------------------------------------|------------|------------------------------------|-------------------------|----------------------------------------------|--------------|
|                                                                | VS/MCS                                                  | SCI        | Mild/Moderate Cognitive Impairment | No Cognitive Impairment | Intellectual Disability/Psychiatric Disorder |              |
| Pneumonia/ Other Acute Pulmonary Condition, n (%)              | 24 (18.5)                                               | 44 (44.0)  | 10 (29.4)                          | 9 (23.7)                | 5 (83.3)                                     | 92 (29.9)    |
| Sepsis or septic shock, n (%)                                  | 9 (6.9)                                                 | 12 (12.0)  | 1 (2.9)                            | 4 (10.5)                | 0 (0)                                        | 26 (8.4)     |
| Exacerbation or End-Stage Chronic Lung Disease, n (%)          | 6 (4.6)                                                 | 11 (11.0)  | 8 (23.5)                           | 6 (15.8)                | 0 (0)                                        | 31 (10.1)    |
| Acute Coronary Syndrome / Congestive Heart Failure, n (%)      | 3 (2.3)                                                 | 2 (2.0)    | 1 (2.9)                            | 1 (2.6)                 | 0 (0)                                        | 7 (2.3)      |
| Post-Cardiopulmonary Resuscitation/ Anoxic Brain Damage, n (%) | 59 (45.4)                                               | 16 (16.0)  | 4 (11.8)                           | 2 (5.3)                 | 1 (16.7)                                     | 82 (26.6)    |
| Acute/ Progressive Neuromuscular Condition, n (%)              | 1 (0.8)                                                 | 1 (1.0)    | 3 (8.8)                            | 6 (15.8)                | 0 (0)                                        | 11 (3.6)     |
| Acute Neurological Event, n (%)                                | 19 (14.6)                                               | 4 (4.0)    | 1 (2.9)                            | 4 (10.5)                | 0 (0)                                        | 28 (9.1)     |
| Postoperative, n (%)                                           | 4 (3.1)                                                 | 6 (6.0)    | 6 (17.6)                           | 5 (13.2)                | 0 (0)                                        | 21 (6.8)     |
| Other, n (%)                                                   | 5 (3.8)                                                 | 4 (4.0)    | 0 (0)                              | 1 (2.6)                 | 0 (0)                                        | 10 (3.2)     |
| Total at Admission to LTACH, n (%)                             | 130 (42.2)                                              | 100 (32.5) | 34 (11.0)                          | 38 (12.3)               | 6 (1.9)                                      | 308 (100)    |
| <i>P</i> *                                                     |                                                         |            |                                    |                         |                                              | <.001        |

LTACH = long-term acute care hospital; SCI = severe cognitive impairment; VS/MCS = vegetative state/minimally conscious state.

\**P* value refers to the difference between the various consciousness and cognitive states at admission to LTACH.



**Supplemental Table 5.** Association Between Consciousness and Cognitive State at Admission to LTACH and Weaning Outcome.

|                                                                | Status of Ventilation at the End of Follow-Up |            | <i>P</i> * |
|----------------------------------------------------------------|-----------------------------------------------|------------|------------|
|                                                                | Weaned                                        | Ventilated |            |
| Consciousness and Cognitive State at Admission to LTACH, n (%) |                                               |            | <.001      |
| VS/MCS                                                         | 1 (0.8)                                       | 128 (99.2) |            |
| SCI                                                            | 3 (3.0)                                       | 97 (97.0)  |            |
| Mild/Moderate Impairment                                       | 1 (3.0)                                       | 32 (97.0)  |            |
| No Cognitive Impairment                                        | 9 (23.7)                                      | 29 (76.3)  |            |
| Intellectual Disability/Psychiatric Disorder                   | 0 (0.0)                                       | 6 (100.0)  |            |
| Total (n = 306)                                                | 14 (4.6)                                      | 292 (95.4) |            |

LTACH = long-term acute care hospital; SCI = severe cognitive impairment; VS/MCS = vegetative state/minimally conscious state.

\* *P* value refers to the difference between the various consciousness and cognitive states at admission to LTACH.

**Supplemental Table 6.** Association between Consciousness and Cognitive State at Admission to LTACH and Location at the End of Follow-Up.

| Consciousness and Cognitive State at Admission to LTACH, n (%) | Patient Location at the End of Follow-Up |          |                |                                                      | <i>P</i> * |
|----------------------------------------------------------------|------------------------------------------|----------|----------------|------------------------------------------------------|------------|
|                                                                | LTACH                                    | Home     | Acute Hospital | Complex Nursing Department/Rehabilitation Department |            |
| VS/MCS                                                         | 36 (60.0)                                | 0 (0.0)  | 24 (40.0)      | 0 (0.0)                                              | <.001      |
| SCI                                                            | 22(42.3)                                 | 5(9.6)   | 24 (46.2)      | 1 (1.9)                                              |            |
| Mild/Moderate Impairment                                       | 3 (14.3)                                 | 5 (23.8) | 11 (52.4)      | 2 (9.5)                                              |            |
| No Cognitive Impairment                                        | 13 (41.9)                                | 7 (22.6) | 7 (22.6)       | 4 (12.9)                                             |            |
| Intellectual Disability/Psychiatric Disorder                   | 4 (100)                                  | 0 (0.0)  | 0 (0.0)        | 0 (0.0)                                              |            |
| Total (n = 168)                                                | 78 (46.4)                                | 17(10.1) | 66 (39.3)      | 7 (4.2)                                              |            |

LTACH = long-term acute care hospital; SCI = severe cognitive impairment; VS/MCS = vegetative state/minimally conscious state.

\* *P* value refers to the difference between the various consciousness and cognitive states at admission to LTACH.

**Supplemental Table 7.** Correlated Proportions Between Consciousness and Cognitive State prior to the Event and at admission to LTACH.

| Consciousness and Cognitive State at Admission to LTACH |                |                  |                                    |                         |                                              |                                 |
|---------------------------------------------------------|----------------|------------------|------------------------------------|-------------------------|----------------------------------------------|---------------------------------|
| Consciousness and Cognitive State Prior to the Event    | VS/MCS         | SCI              | Mild/Moderate Cognitive Impairment | No Cognitive Impairment | Intellectual Disability/Psychiatric Disorder | Total Prior to the Event, n (%) |
| VS/MCS, n (%)                                           | <b>4 (1.3)</b> | 0 (0)            | 0 (0)                              | 0 (0)                   | 0 (0)                                        | 4 (1.3)                         |
| SCI, n (%)                                              | 13 (4.2)       | <b>58 (18.8)</b> | 0 (0)                              | 0 (0)                   | 0 (0)                                        | 71 (23.1)                       |
| Mild/Moderate Cognitive Impairment, n (%)               | 22 (7.1)       | 22 (7.1)         | <b>13 (4.2)</b>                    | 0 (0)                   | 0 (0)                                        | 57 (18.5)                       |
| No cognitive Impairment, n (%)                          | 84 (27.3)      | 19 (6.2)         | 21 (6.8)                           | <b>38 (12.3)</b>        | 0 (0)                                        | 162 (52.6)                      |
| Intellectual Disability/Psychiatric Disorder, n (%)     | 7 (2.3)        | 1 (0.3)          | 0 (0)                              | 0 (0)                   | <b>6 (1.9)</b>                               | 14 (4.5)                        |
| Total at Admission to LTACH, n (%)                      | 130 (42.2)     | 100 (32.5)       | 34 (11.0)                          | 38 (12.3)               | 6 (1.9)                                      | 308 (100)                       |
| <i>P</i>                                                |                |                  |                                    |                         |                                              | <.001                           |

LTACH = long-term acute care hospital; SCI = severe cognitive impairment; VS/MCS = vegetative state/minimally conscious state.

**Supplemental Table 8.** Correlated Proportions Between Consciousness and Cognitive State at Admission to LTACH and at the End of Follow-Up.

| Consciousness and Cognitive State at the End of Follow-Up |                   |                  |                                    |                         |                                              |                                    |
|-----------------------------------------------------------|-------------------|------------------|------------------------------------|-------------------------|----------------------------------------------|------------------------------------|
| Consciousness and Cognitive State at Admission to LTACH   | VS/MCS            | SCI              | Mild/Moderate Cognitive Impairment | No Cognitive Impairment | Intellectual Disability/Psychiatric Disorder | Total at Admission to LTACH, n (%) |
| VS/MCS, n (%)                                             | <b>120 (39.0)</b> | 9 (2.9)          | 1 (0.3)                            | 0 (0)                   | 0 (0)                                        | 130 (42.2)                         |
| SCI, n (%)                                                | 3 (1.0)           | <b>92 (29.9)</b> | 5 (1.6)                            | 0 (0)                   | 0 (0)                                        | 100 (32.5)                         |
| Mild/Moderate Cognitive Impairment, n (%)                 | 1 (0.3)           | 7 (2.3)          | <b>24 (7.8)</b>                    | 2 (0.6)                 | 0 (0)                                        | 34 (11.0)                          |
| No Cognitive Impairment, n (%)                            | 2 (0.6)           | 1 (0.3)          | 2 (0.6)                            | <b>33 (10.7)</b>        | 0 (0)                                        | 38 (12.3)                          |
| Intellectual Disability/Psychiatric Disorder, n (%)       | 0 (0)             | 1 (0.3)          | 0 (0)                              | 0 (0)                   | <b>5 (1.6)</b>                               | 6 (1.9)                            |
| Total at the End of Follow-Up, n (%)                      | 126 (40.9)        | 110 (35.7)       | 32 (10.4)                          | 35 (11.4)               | 5 (1.6)                                      | 308 (100)                          |
| <i>P</i>                                                  |                   |                  |                                    |                         |                                              | .395                               |

LTACH = long-term acute care hospital; SCI = severe cognitive impairment; VS/MCS = vegetative state/minimally conscious state.
